# Supplementary material
Source: publisher figshare collection journal article supplement (https://acs.figshare.com/ndownloader/files/3866773)
Supplement: Supplementary file 1 [file 3866773]

# Supporting Information

## Aligned Nanostructured Polymers by Magnetic Field Directed Self-Assembly of a Polymerizable Lyotropic Mesophase

*Marissa E. Tousley, Xunda Feng, Menachem Elimelech, Chinedum O. Osuji\**

Department of Chemical and Environmental Engineering, Yale University, 9 Hillhouse Avenue,  
New Haven, CT 06511

\* Corresponding author: Chinedum Osuji, Email: [chinedum.osuji@yale.edu](mailto:chinedum.osuji@yale.edu), Phone: (203) 432-4347

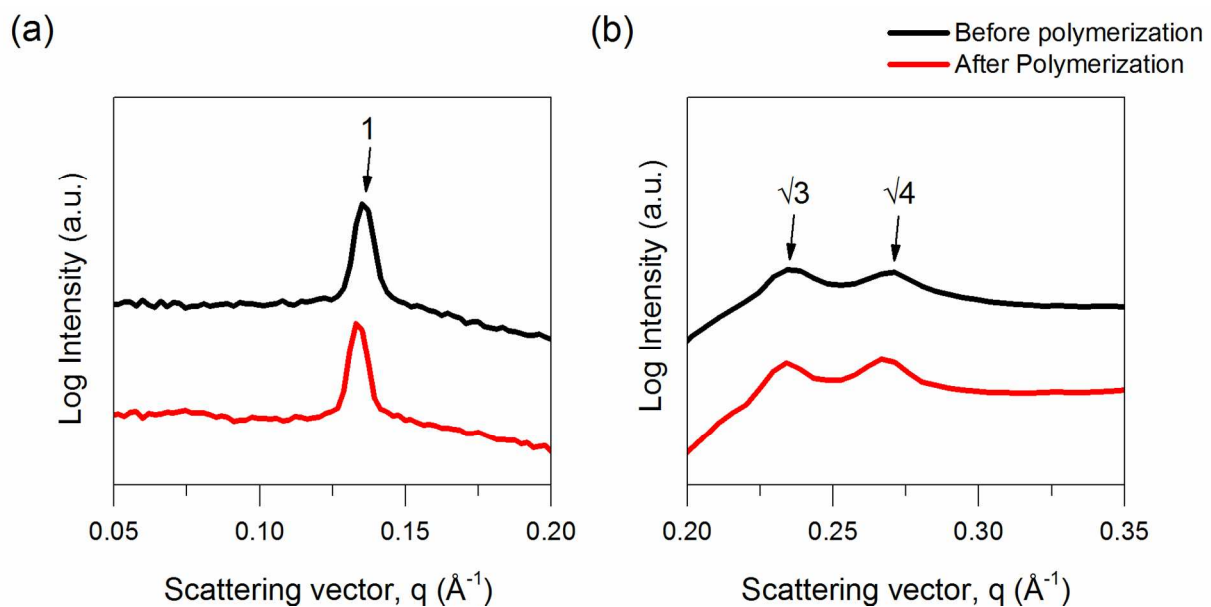

**Figure S1.** Scattering data confirming the presence of an  $H_{II}$  phase. (a) 1-D SAXS showing 1<sup>st</sup> order peak. (b) 1-D WAXS showing 2<sup>nd</sup> and 3<sup>rd</sup> order peaks.

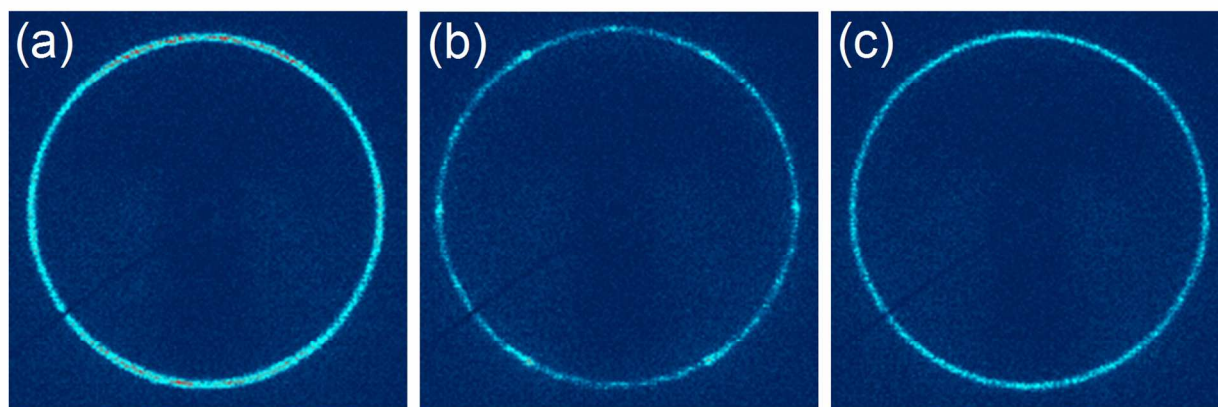

**Figure S2.** 2-D SAXS pattern of the lyotropic template rotated at (a) 25 °C before alignment and (b) 60 °C and (c) 25 °C after alignment in a 0 T field.
